# Supplementary material
Source: publisher figshare collection journal article supplement (https://acs.figshare.com/ndownloader/files/25999896)
Supplement: Supplementary file 1 [file 25999896]

Compound	SMILE	TPH1 % inhibition at 10uM	TPH1 % inhibition at 1uM	TPH1 IC50 (nM)
8	OC([C@@H](N)CC1=CC=C(C2=NC=C(C3=CC=C(OC)C=C3)N2)C=C1)=O.Cl	80.3	20.9
12a	OC([C@@H](N)CC1=CC=C(C2=NC=C(C3=CC=C(OC)C=C3)S2)C=C1)=O.Cl	60.4	10
12b	OC([C@@H](N)CC1=CC=C(C2=NC=C(C3=CC=C(OC)C(OC)=C3)S2)C=C1)=O.Cl	63.7	15
17a	OC([C@@H](N)CC1=CC=C(C2=NOC(C3=CC=C(OC)C=C3)=N2)C=C1)=O.Cl	81.9	53	483
17f	OC([C@@H](N)CC1=CC=C(C2=NOC(C3=CC=C(OC)C(OC)=C3)=N2)C=C1)=O.Cl		68	490
29a	OC([C@@H](N)CC1=CC=C(C2=NN=C(C3=CC=C(OC)C=C3)O2)C=C1)=O.Cl	21.9	< 5
29b	OC([C@@H](N)CC1=CC=C(C2=NN=C(C3=CC=C(OC)C(OC)=C3)O2)C=C1)=O.Cl		< 5
34a	OC([C@@H](N)CC1=CC=C(C2=NSC(C3=CC=C(OC)C=C3)=N2)C=C1)=O.Cl	10.5	< 5
34b	OC([C@@H](N)CC1=CC=C(C2=NSC(C3=CC=C(OC)C(OC)=C3)=N2)C=C1)=O.Cl	19.1	11.2
17b	OC([C@@H](N)CC1=CC=C(C2=NOC(C3=CC=CC=C3)=N2)C=C1)=O.Cl		< 5
17c	OC([C@@H](N)CC1=CC=C(C2=NOC(C3=CC=C(F)C=C3)=N2)C=C1)=O.Cl		47	1570
17d	OC([C@@H](N)CC1=CC=C(C2=NOC(C3=CC=C(O)C=C3)=N2)C=C1)=O.Cl		< 5
17e	OC([C@@H](N)CC1=CC=C(C2=NOC(C3=CC=CC(OC)=C3)=N2)C=C1)=O.Cl		< 5
17g	OC([C@@H](N)CC1=CC=C(C2=NOC(C3=CC=C(OCC)C=C3)=N2)C=C1)=O.Cl		< 5
17h	OC([C@@H](N)CC1=CC=C(C2=NOC(CC3=CC=C(OC)C=C3)=N2)C=C1)=O.Cl		< 5
17i	OC([C@@H](N)CC1=CC=C(C2=NOC(C3=CC=C(OC)C(C4=CC=CC=C4)=C3)=N2)C=C1)=O.Cl		97	166
17j	OC([C@@H](N)CC1=CC=C(C2=NOC(C3=CC=C(OC)C(C4=CC=C(OC)C=C4)=C3)=N2)C=C1)=O.Cl		~100	65
23a	OC([C@@H](N)CC1=CC=C(C2=NOC(C3=CC=C(OC)C(C4=CC=C(O)C=C4)=C3)=N2)C=C1)=O.Cl		~100	42
23b	OC([C@@H](N)CC1=CC=C(C2=NOC(C3=CC=C(OC)C(C4=CC=CC(O)=C4)=C3)=N2)C=C1)=O.Cl		96.7	60
23c	OC([C@@H](N)CC1=CC=C(C2=NOC(C3=CC=C(OC)C(C4=CC=CC=C4O)=C3)=N2)C=C1)=O.Cl		97	49
23d	OC([C@@H](N)CC1=CC=C(C2=NOC(C3=CC=C(OC)C=C3C4=CC=C(O)C=C4)=N2)C=C1)=O.Cl		43.5
24	NC([C@@H](N)CC1=CC=C(C2=NOC(C3=CC=C(OC)C(C4=CC=C(O)C=C4)=C3)=N2)C=C1)=O.Cl		< 5
26	O=C(OCC)[C@@H](N)CC1=CC=C(C2=NOC(C3=CC=C(OC)C(C4=CC=C(O)C=C4)=C3)=N2)C=C1.Cl		80.7	120
